# Supplementary material for: Enhancing the photovoltaic performance of planar heterojunction perovskite solar cells by doping the perovskite layer with alkali metal ions
Source: Royal Society of Chemistry journal article supplement (doi:10.1039/c6ta06851k), 2016-01-01
Supplement: c6ta06851k1.pdf [file c6ta06851k1.pdf]

## Supporting Information for

### **Enhancing the Photovoltaic Performance of Planar Heterojunction Perovskite Solar Cells by Doping the Perovskite Layer with Alkali Metals**

Jingjing Chang,<sup>a,b\*</sup> Zhenhua Lin,<sup>a</sup> Hai Zhu,<sup>c</sup> Furkan Halis Isikgor,<sup>b</sup> Qing-Hua Xu,<sup>c</sup> Chunfu Zhang,<sup>a</sup> Yue Hao,<sup>a</sup> Jianyong Ouyang<sup>b\*</sup>

<sup>a</sup>State Key Laboratory of Wide Band Gap Semiconductor Technology, School of Microelectronics, Xidian University, 2 South Taibai Road, Xi'an, China 710071. \*E-mail: jjingchang@xidian.edu.cn.

<sup>b</sup>Department of Materials Science & Engineering, National University of Singapore, 7 Engineering Drive 1, Singapore 117574. \*E-mail: mseoj@nus.edu.sg.

<sup>c</sup>Department of Chemistry, National University of Singapore, 3 Science Drive 3, Singapore 117543.

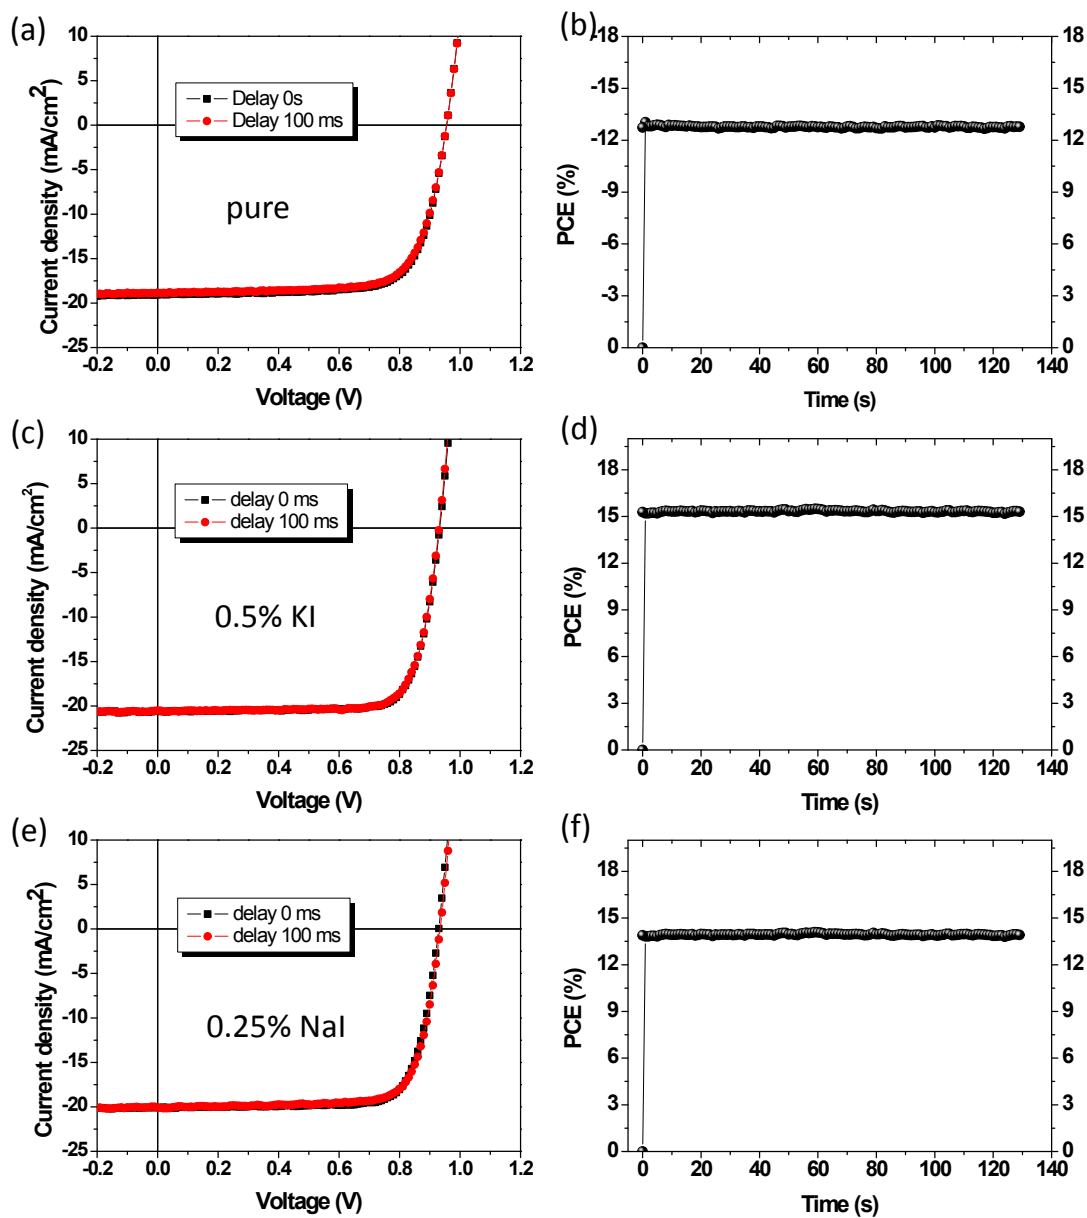

**Figure S1.**  $J$ - $V$  characteristics with different scan rates and steady-state PCE at maximum power point as a function of time of the PSCs with the perovskite layers of no doping (a, b) and doping of 0.5 mol%  $\text{K}^+$  (c, d), 0.25 mol%  $\text{Na}^+$  (e, f).

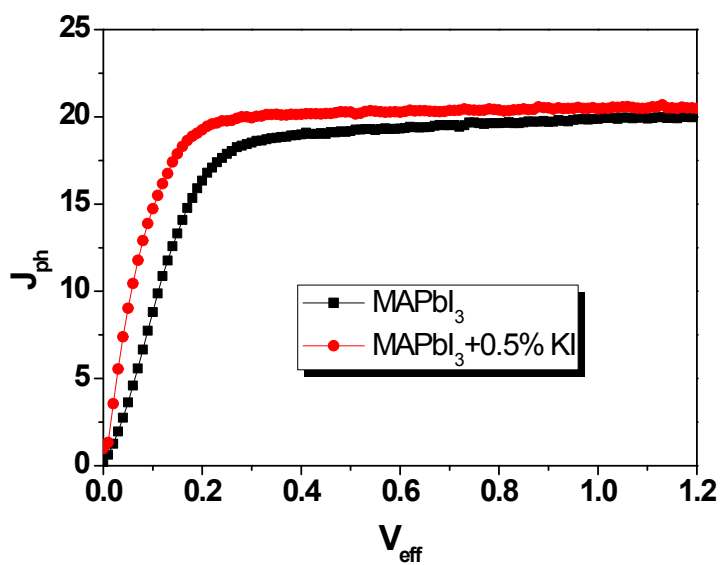

**Figure S2.**  $J_{\text{ph}}-V_{\text{eff}}$  curves for PSCs with  $\text{MAPbI}_3$  films undoped and doped with 0.5 mol%  $\text{K}^+$ .

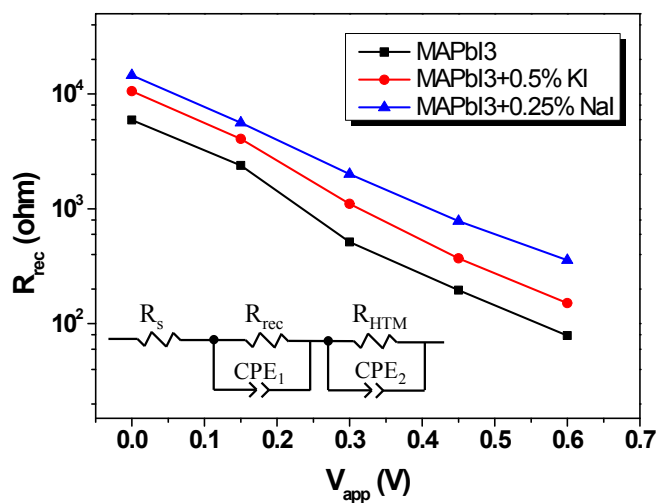

**Figure S3.** Electrochemical impedance spectroscopy (EIS) analysis. Recombination resistance ( $R_{\text{rec}}$ ) was plotted against applied voltage, and determined by EIS measurements in the dark (inset: the simplified circuit model).

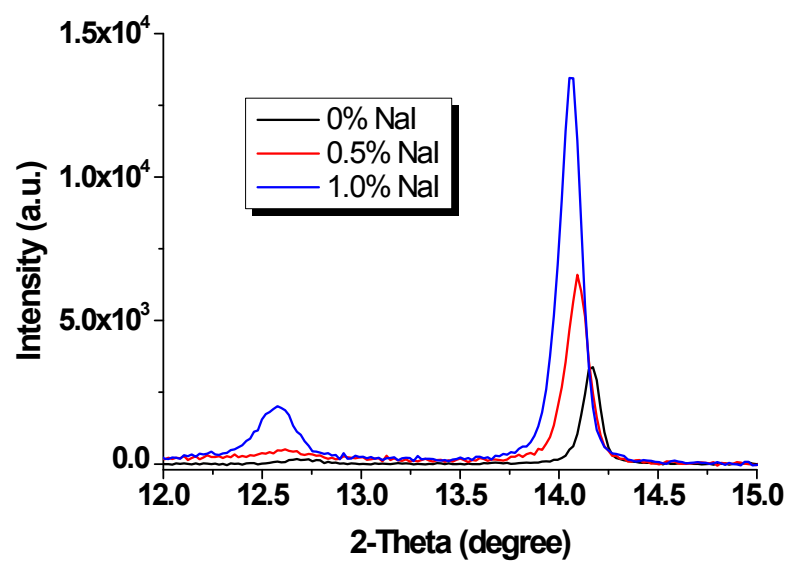

**Figure S4.** XRD patterns of the MAPbI<sub>3</sub> films with different Na<sup>+</sup> doping degrees.

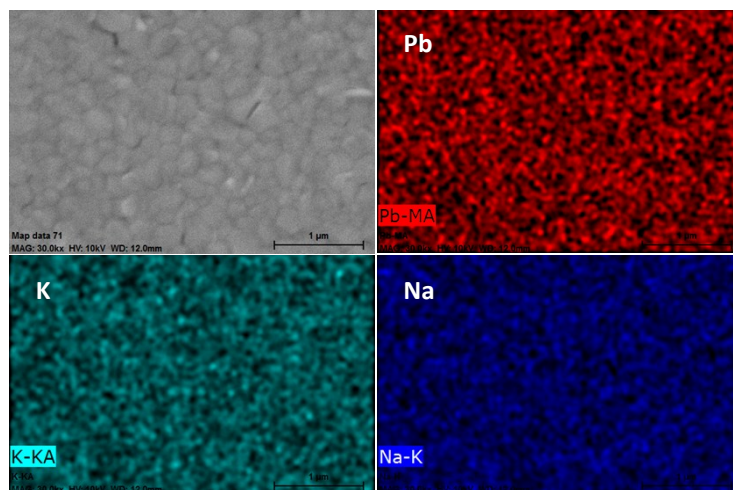

**Figure S5.** The SEM element mapping of pure perovskite thin film.

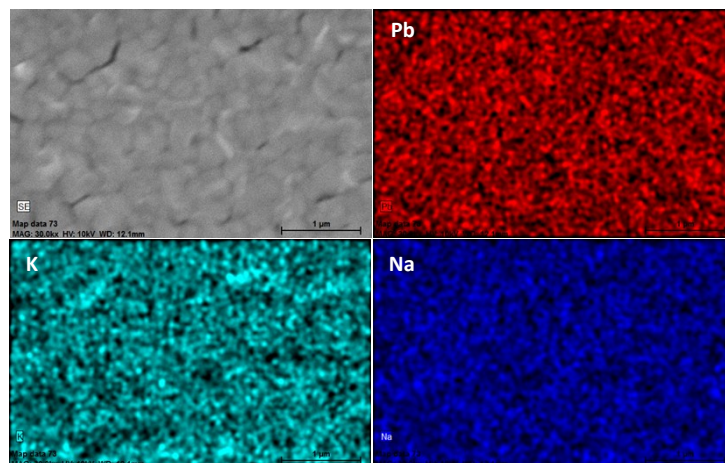

**Figure S6.** The SEM element mapping of 0.5% KI doped perovskite thin film.

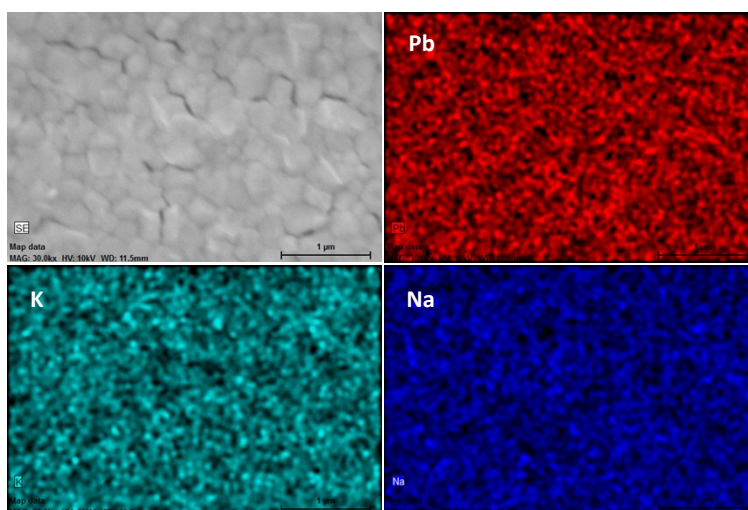

**Figure S7.** The SEM element mapping of 0.25% NaI doped perovskite thin film.

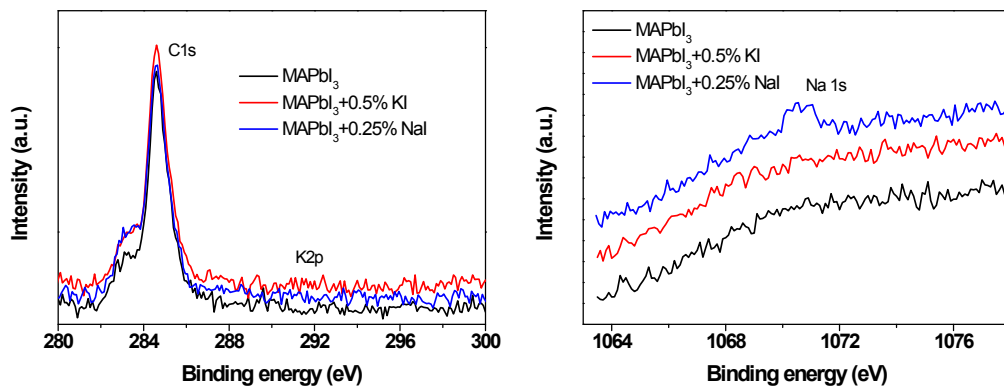

**Figure S8.** XPS spectra of K2p and Na1s peak for pure and KI (or NaI) doped thin films.
